# Supplementary material
Source: publisher figshare collection journal article supplement (https://tandf.figshare.com/articles/dataset/_/22730502)
Supplement: Supplementary file 1 [file 1]

*In silico* Study to Recognize Novel Angiotensin-Converting-Enzyme-I Inhibitors by 2D-QSAR and Constraint-based Molecular Simulations

Sapan Shah*[a], Dinesh Chaple[a], Vijay H. Masand[b], Magdi E.A. Zaki*[c], Sami A. Al-Hussain[c], Ashish Shah[d], Sumit Arora[e], Rahul Jawarkar[f], Mohammad Tauqeer[g]

[a]Department of Pharmaceutical Chemistry, Priyadarshini J. L. College of Pharmacy, Hingna Road, Nagpur-440016, Maharashtra, India.

[b]Department of Chemistry, Vidya Bharati Mahavidyalaya, Amravati-444601, Maharashtra, India. Orcid ID: 0000-0001-9300-4147

[c]Department of Chemistry, Faculty of Science, Imam Mohammad Ibn Saud Islamic University, Riyadh 13318, Saudi Arabia. Orcid ID: 0000-0002-4305-934X

[d]Department of Pharmacy, Sumandeep Vidyapeeth, Vadodara, Gujarat, India. Orcid ID: 0000-0003-0817-5940

[e]Department of Pharmacognosy, Gurunanak College of Pharmacy, Nari Road, Nagpur, Maharashtra, India. Orcid ID: 0000-0001-9453-6057

[f]Department of Medicinal Chemistry and Drug Discovery, Dr. Rajendra Gode Institute of Pharmacy, University Mardi Road, Amravati 444603, India; Email: rahuljawarkar@gmail.com. Orcid ID: 0000-0003-3563-6642

[g]Department of Pharmacognosy, Dr. Arun Motghare College of Pharmacy, Kosra-Kondha, Dist. Bhandara, Maharashtra, India; mohdtauqeer06@gmail.com

***Corresponding Author:**

Mr. Sapan K. Shah

Assistant Professor

Department of Pharmaceutical Chemistry,

Priyadarshini J. L. College of Pharmacy,

Nagpur-440016

Maharashtra, India.

Mobile number: +91-9665006696

Email address: [shah.sapan@rediffmail.com](mailto:shah.sapan@rediffmail.com)

Orcid ID: 0000-0002-8155-9361

1. **A platform for molecular docking**

The computational docking assessment of selected compounds with ACE as a target was executed via MOE 2019 software (Chemical Computing Group, Montreal, Canada), software.

1. **Protein preparation:**

The enzyme crystal structures were extracted from the protein databank with the PDB id: 1o86 (Crystal Structure of Human Angiotensin-Converting Enzyme in complex with lisinopril) and 3NXQ (Crystal structure of Angiotensin-Converting Enzyme N domain in complex with RXP407). The 1o86 (PDB ID: 1o86, having resolution ~2. Å, R-Value Free <0.25, R-Value Work<0.20) is a complex inhibitor with a monomer of ACE that plays a central key role in the management of hypertension [1, 2]. The 3NXQ (PDB ID: 3NXQ, having resolution ~2. Å, R-Value Free <0.25, R-Value Work < 0.20) is possible treatment for both cardiac and pulmonary fibrosis[3]. From both crystal structures, Chain A was used for macromolecule preparation, all other molecules like co-crystallized water molecules, unwanted chains, and nonstandard residues were deleted. The free target protein was then subjected to the QuickPrep procedure of MOE including corrections for missing atoms, alternate geometries, or other crystallographic artifacts, removing water molecules farther than 4.5 A⁰ from any receptor or ligand atom, and 3D protonation.

1. **Ligand preparations**

The three-dimensional structures of compounds were built using smiles notations in open babel. The energy of all ligands was minimized with an MMFF94 force field using openbabel.The chemical structures of all the ligands are depicted in Figure. S1.

**Figure S1. Selected chemical compounds for docking against C-domain ACE (PDB ID: 1o86) and N-domain ACE (PDB ID:3NXQ)**

1. **Molecular Docking Procedure**

A primary objective in molecular docking was the ability to estimate the scoring function and to evaluate interactions between a protein and small molecules based on the geometry to predict the binding affinity and activity of the ligand molecule [4, 5].

In this study to investigate the detailed intermolecular interactions, the molecular operating environment (MOE) software package (Molecular Operating Environment, 2015) was used to perform various steps involved in docking simulation. Pharmacophores constraints were generated using the Pharmacophore query editor containing metal chelation constraint and one positional constrain amide/amine Nitrogen with 1 A⁰ constraint sphere (Figure S2). This pharmacophore was used in the docking using the pharmacophore placement method at site centered on co-crystallized ligand atoms and top 1000 poses ranked by London dG scoring function. Although, the final results were analyzed and visualized based on docking scores using Discovery Studio 2020 Client[6], Ligplot v.4.5.3 [7], and PyMol software’s[8].

**Figure S2. An illustration of the metal chelation and positional constraints created and implemented for docking chemical compounds against C-domain ACE (PDB ID: 1o86) and N-domain ACE (PDB ID:3NXQ)**

**References**

1. Kureya P, Beevers DG (1991) The mechanisms of hypertension and the role of ACE inhibitors. J Hum Hypertens 5 Suppl 2:3–8

2. Hilleman DE (2000) Role of angiotensin-converting-enzyme inhibitors in the treatment of hypertension. Am J Heal Pharm 57:S8–S11. https://doi.org/10.1093/ajhp/57.suppl_1.S8

3. Fienberg S, Cozier GE, Acharya KR, et al (2018) The Design and Development of a Potent and Selective Novel Diprolyl Derivative That Binds to the N-Domain of Angiotensin-I Converting Enzyme. J Med Chem 61:344–359. https://doi.org/10.1021/acs.jmedchem.7b01478

4. Verdonk ML, Cole JC, Hartshorn MJ, et al (2003) Improved protein–ligand docking using GOLD. Proteins Struct Funct Bioinforma 52:609–623. https://doi.org/10.1002/prot.10465

5. Leach AR, Shoichet BK, Peishoff CE (2006) Prediction of Protein−Ligand Interactions. Docking and Scoring:  Successes and Gaps. J Med Chem 49:5851–5855. https://doi.org/10.1021/jm060999m

6. BIOVIA DS (2016) Discovery Studio Modeling Environment, Release 2017, San Diego. In: Dassault Systèmes

7. Wallace AC, Laskowski RA, Thornton JM (1995) LIGPLOT: a program to generate schematic diagrams of protein-ligand interactions. Protein Eng Des Sel 8:127–134. https://doi.org/10.1093/protein/8.2.127

8. L DeLano W (2002) Pymol: An open-source molecular graphics tool. {CCP4} Newsl Protein Crystallogr
